# Supplementary material for: Effects of a heteroatomic benzothienothiophenedione acceptor on the properties of a series of wide-bandgap photovoltaic polymers
Source: Royal Society of Chemistry journal article supplement (doi:10.1039/c6tc02915a), 2016-01-01
Supplement: c6tc02915a1.pdf [file c6tc02915a1.pdf]

Electronic Supplementary Information For

**Effect of heteroatomic benzothienothiophenedione acceptor on  
properties of a series of wide-bandgap photovoltaic polymers**

Xinxin Huang,<sup>‡a</sup> Kangkang Wen,<sup>‡b</sup> Lijun Huo,<sup>\*,b</sup> Bingbing Fan,<sup>b</sup> Chunhe Yang,<sup>\*,a</sup>  
Xiaobo Sun,<sup>b</sup> Yanming Sun<sup>\*,b</sup>

<sup>a</sup>Department of Chemistry, School of Science, Beijing Jiaotong University, Beijing 100044, P. R. China. \*E-mail: chy@bjtu.edu.cn

<sup>b</sup>Heeger Beijing Research and Development Center, School of Chemistry and Environment, Beihang University, Beijing 100191, P. R. China. \*E-mail: huolijun@buaa.edu.cn; sunym@buaa.edu.cn

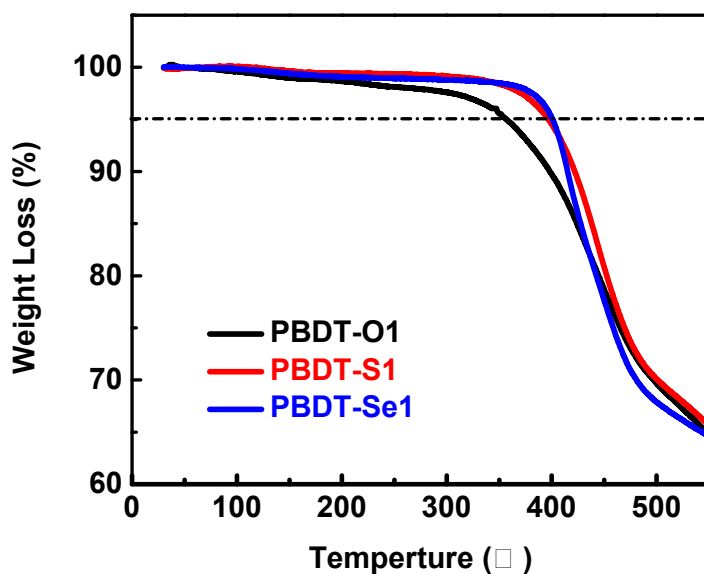

**Figure S1.** TGA thermograms of the copolymers of PBDT-O1, PBDT-S1 and PBDT-Se1 with a heating rate of  $10^{\circ}\text{C min}^{-1}$  under nitrogen atmosphere

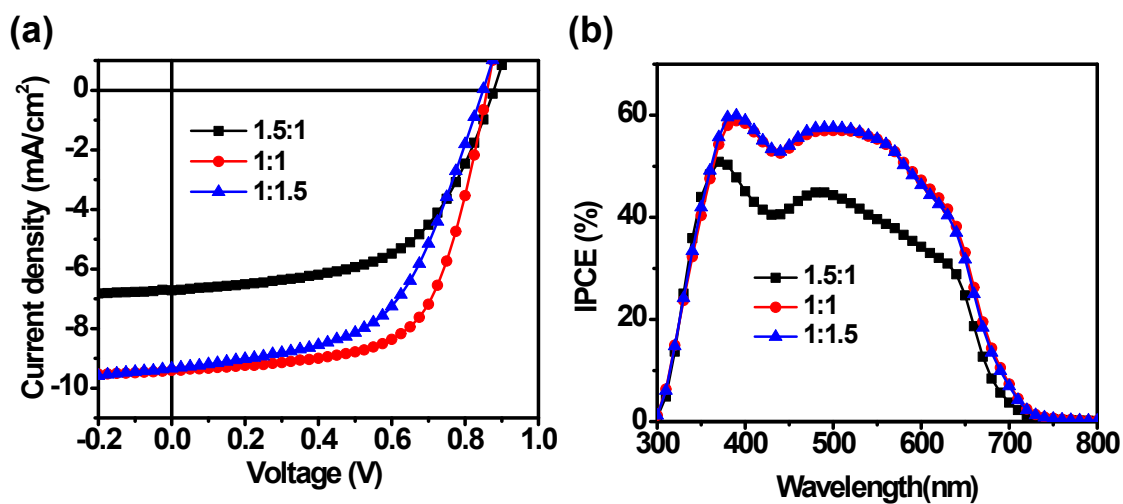

**Figure S2.** (a) Current density-voltage characteristics and (b) IPCE spectra of PBDT-O1:PC<sub>70</sub>BM solar cells with different weight ratios.

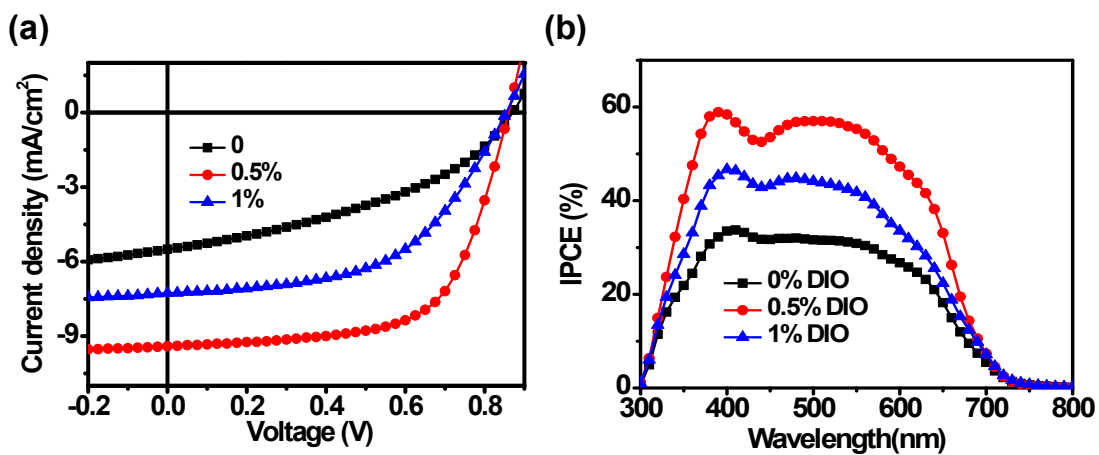

**Figure S3.** (a) Current density-voltage characteristics and (b) IPCE spectra of PBDDT-01:PC<sub>70</sub>BM solar cells with different DIO concentration at the blend ratio of 1:1.

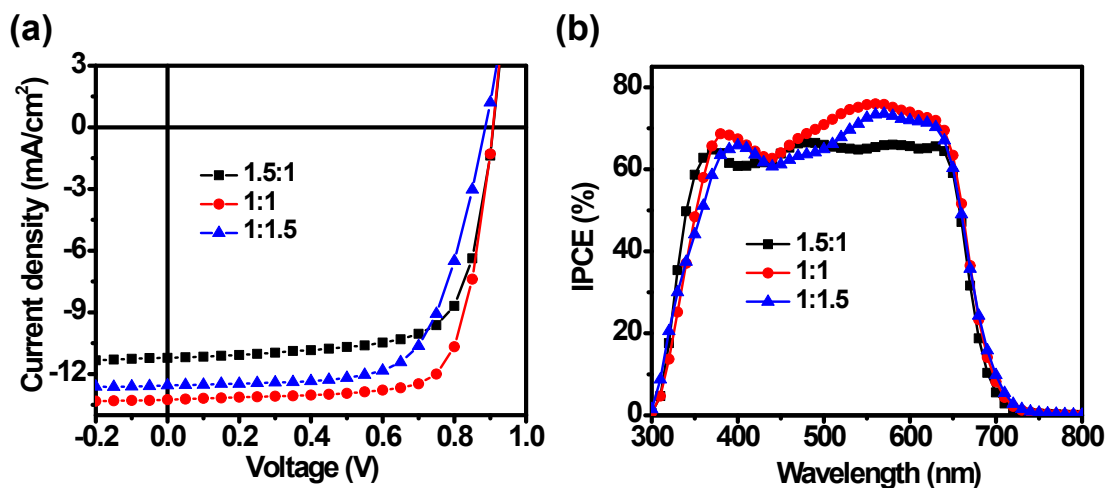

**Figure S4.** (a) Current density-voltage characteristics and (b) IPCE spectra of PBDDT-S1:PC<sub>70</sub>BM solar cells with different weight ratios.

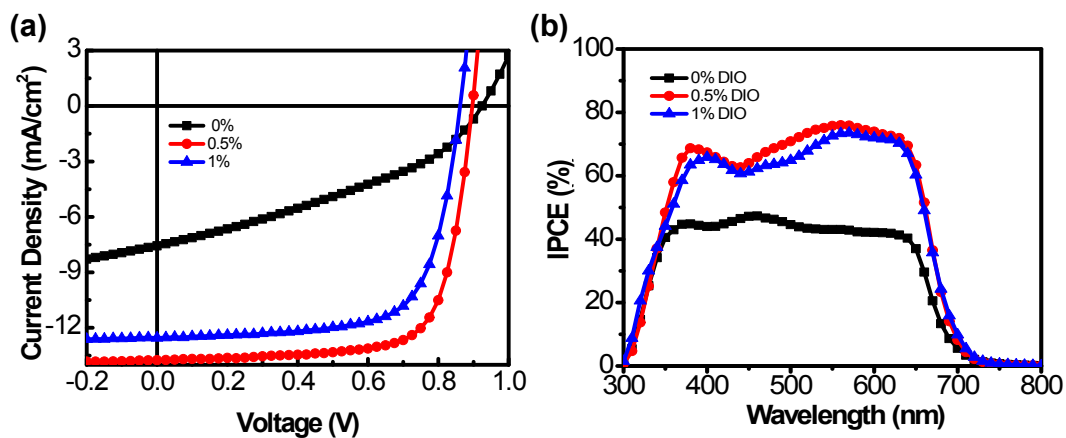

**Figure S5.** (a) Current density-voltage characteristics and (b) IPCE spectra of PBDT-S1:PC<sub>70</sub>BM solar cells with different DIO concentration at the blend ratio of 1:1.

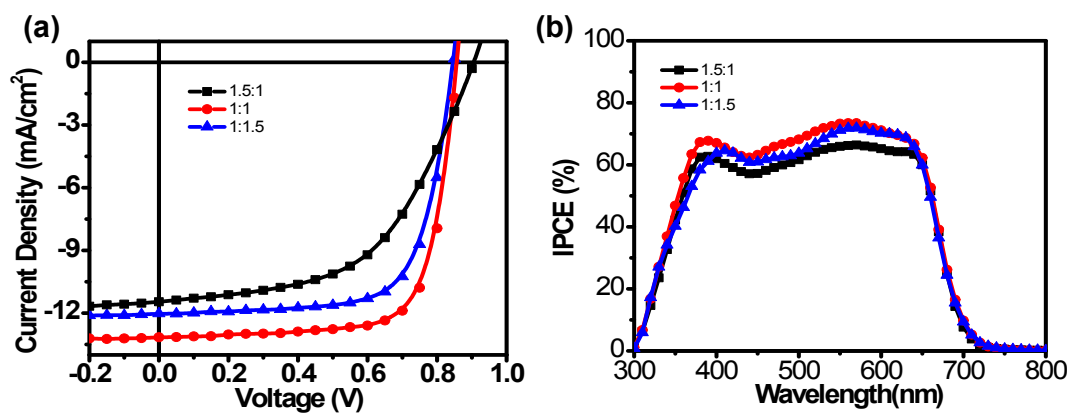

**Figure S6.** (a) Current density-voltage characteristics and (b) IPCE spectra of PBDT-Se1:PC<sub>70</sub>BM solar cells with different weight ratios.

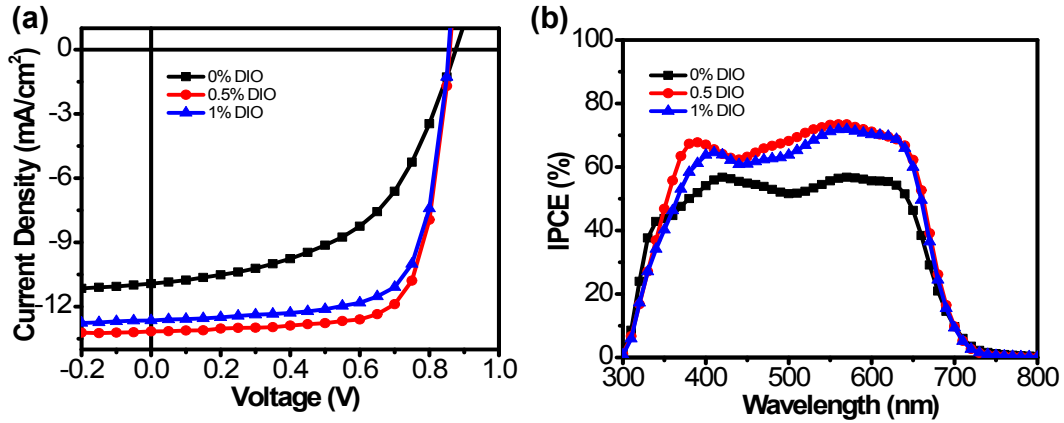

**Figure S7.** (a) Current density-voltage characteristics and (b) IPCE spectra of PBDDT-Se1:PC<sub>70</sub>BM solar cells with different DIO concentration at the blend ratio of 1:1.

**Table S1.** Photovoltaic performance of solar cells based on different weight ratios of PBDDT-X1: PC<sub>70</sub>BM in a conventional structure under the illumination of AM1.5G, 100 mW/cm<sup>2</sup>.

| Active layer                  | Weight ratios (w/w) | V <sub>oc</sub> (V) | J <sub>sc</sub> (mA/cm <sup>2</sup> ) | FF (%) | PCE (%) |
|-------------------------------|---------------------|---------------------|---------------------------------------|--------|---------|
| PBDDT-O1:PC <sub>70</sub> BM  | 1:1.5               | 0.84                | 9.4                                   | 55.7   | 4.4     |
|                               | 1:1                 | 0.86                | 9.3                                   | 63.3   | 5.1     |
|                               | 1.5:1               | 0.87                | 6.9                                   | 55.3   | 3.3     |
| PBDDT-S1:PC <sub>70</sub> BM  | 1:1.5               | 0.89                | 12.6                                  | 68.8   | 7.7     |
|                               | 1:1                 | 0.89                | 13.4                                  | 74.2   | 8.9     |
|                               | 1.5:1               | 0.91                | 11.5                                  | 69.3   | 7.2     |
| PBDDT-Se1:PC <sub>70</sub> BM | 1:1.5               | 0.84                | 11.7                                  | 71.6   | 7.1     |
|                               | 1:1                 | 0.85                | 12.9                                  | 73.6   | 8.1     |
|                               | 1.5:1               | 0.90                | 11.6                                  | 50.7   | 5.3     |

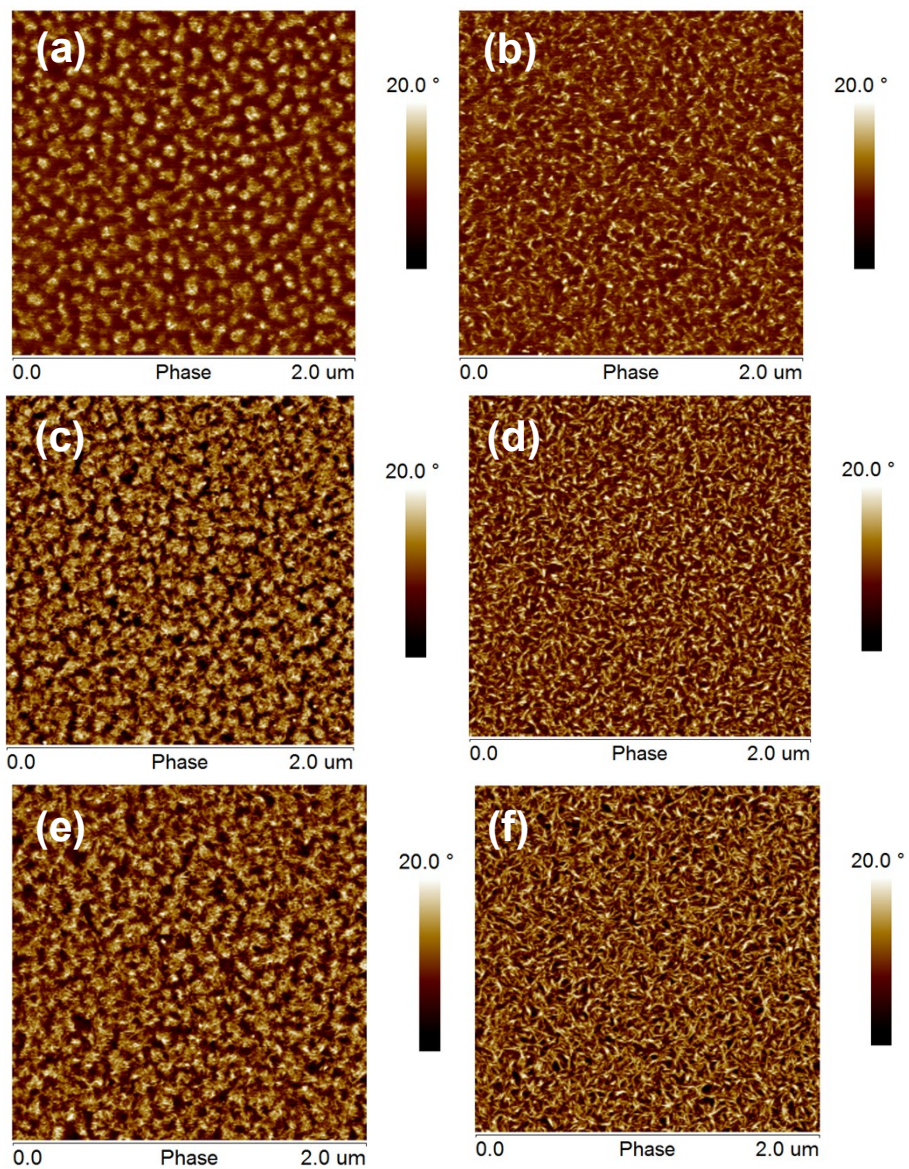

**Figure S8.** AFM phase images. (a) PBDT-O1:PC<sub>70</sub>BM blend film, (b) PBDT-O1:PC<sub>70</sub>BM blend film with 0.5% DIO, (c) PBDT-S1:PC<sub>70</sub>BM blend film, (d) PBDT-S1:PC<sub>70</sub>BM blend film with 0.5% DIO, (e) PBDT-Se1:PC<sub>70</sub>BM blend film, (f) PBDT-Se1:PC<sub>70</sub>BM blend film with 0.5% DIO
